# Supplementary material for: Construction of AgCl/Ag/BiOCl with a concave-rhombicuboctahedron core–shell hierarchitecture and enhanced photocatalytic activity
Source: Royal Society of Chemistry journal article supplement (doi:10.1039/c6ra14170f), 2016-01-01
Supplement: c6ra14170f1.pdf [file c6ra14170f1.pdf]

## Supplementary Material

### Construction of AgCl/Ag/BiOCl of concave-rhombicuboctahedron core-shell hierarchy with enhanced photocatalytic activity

Zhikun Xu\*, Shuang-Yan Lin\*

Key Laboratory for Photonic and Electronic Bandgap Materials, Ministry of Education, School of Physics and Electronic Engineering, Harbin Normal University, Harbin 150025, Heilongjiang, People's Republic of China

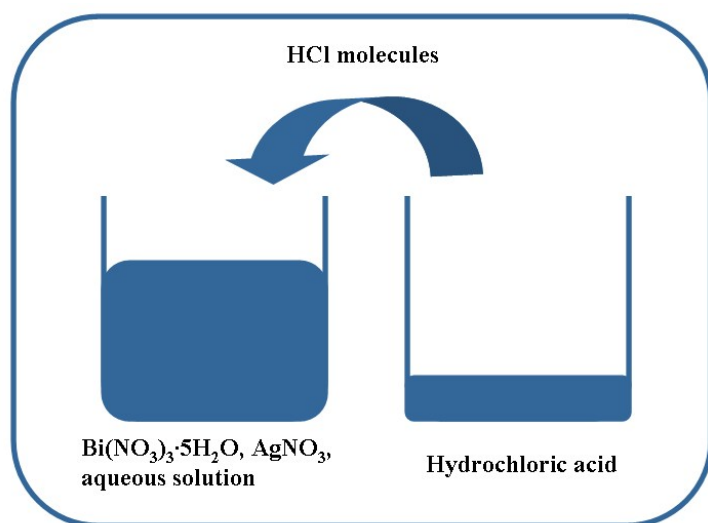

Scheme S1. The scheme of vessel in the experiment.

Table S1

|                  | C1s   | O1s   | Cl2p  | Ag3d  | Bi4f  |
|------------------|-------|-------|-------|-------|-------|
| Atomic ratio (%) | 45.98 | 11.60 | 20.48 | 11.81 | 10.12 |

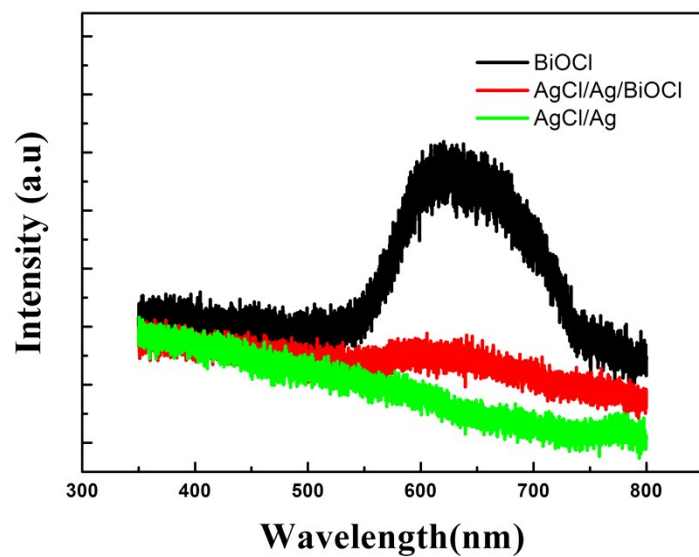

**Figure S1. The PL spectra of different samples.**
